# Supplementary material for: O-GlcNAcylation and Regulation of Galectin-3 in Extraembryonic Endoderm Differentiation
Source: MDPI journal article supplement (doi:10.3390/biom12050623), 2022-04-22
Supplement: s1 [file s1]

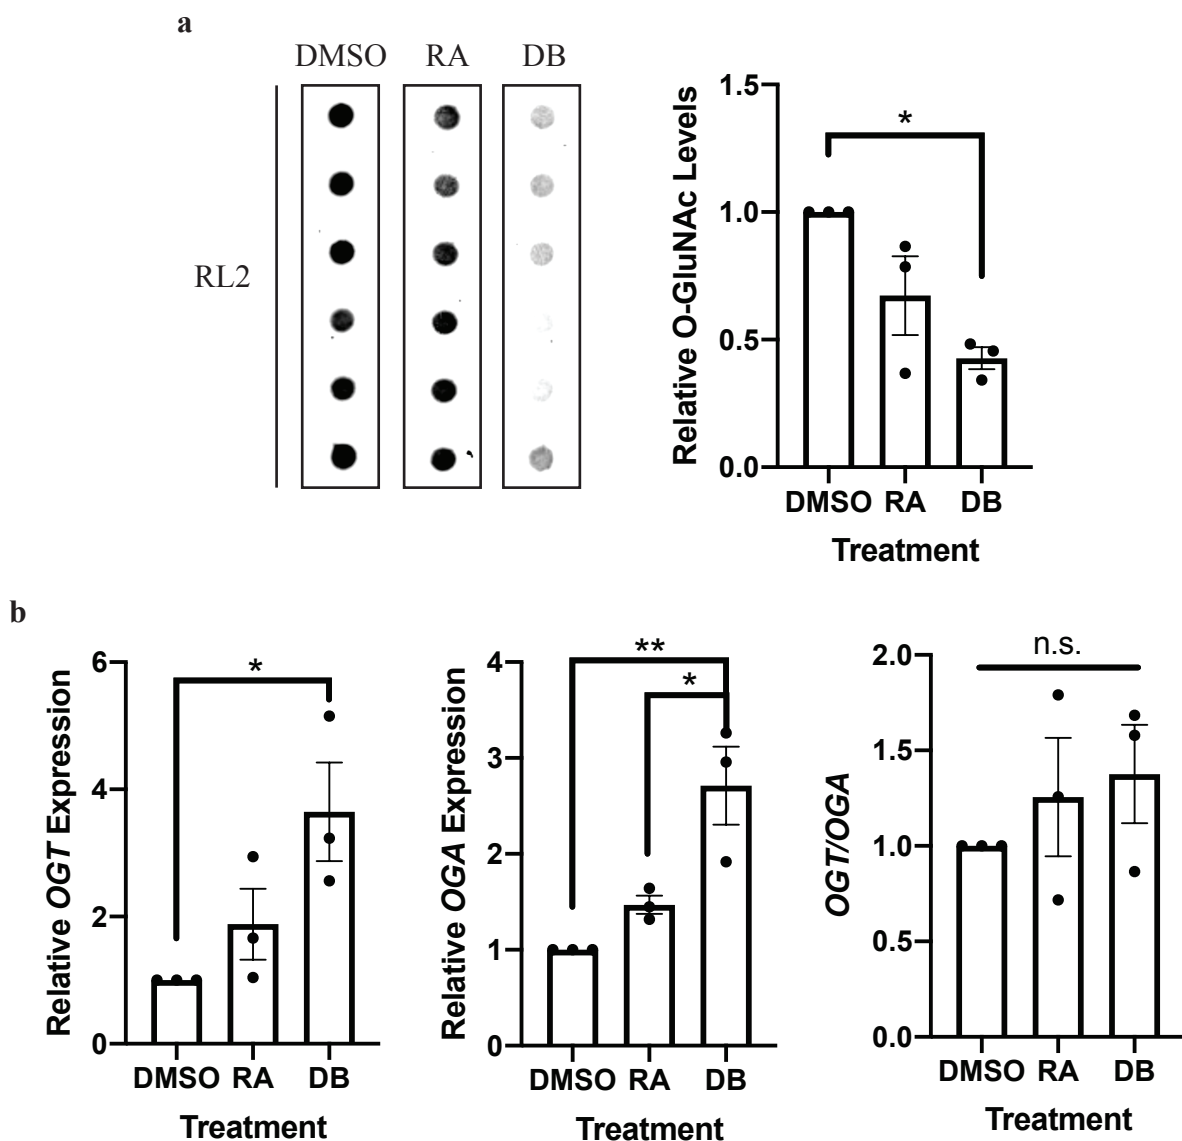

**Supplementary Figure S1.** Global O-GlcNAcylation decreases with F9 cell differentiation towards a XEN-like lineage: **(a)** Immunodot blot and densitometry of F9 cells treated with DMSO (control), 0.5 $\mu$ M RA, or 0.5 $\mu$ M RA + 1 mM db-cAMP; **(b)** Expression levels of *Ogt* and *Oga* transcripts in F9 cells treated as in (a) as detected by RT-qPCR and their ratio. Bars represent means values  $\pm$  S.E.M, N=3. \*P<0.05, \*\*P<0.01.

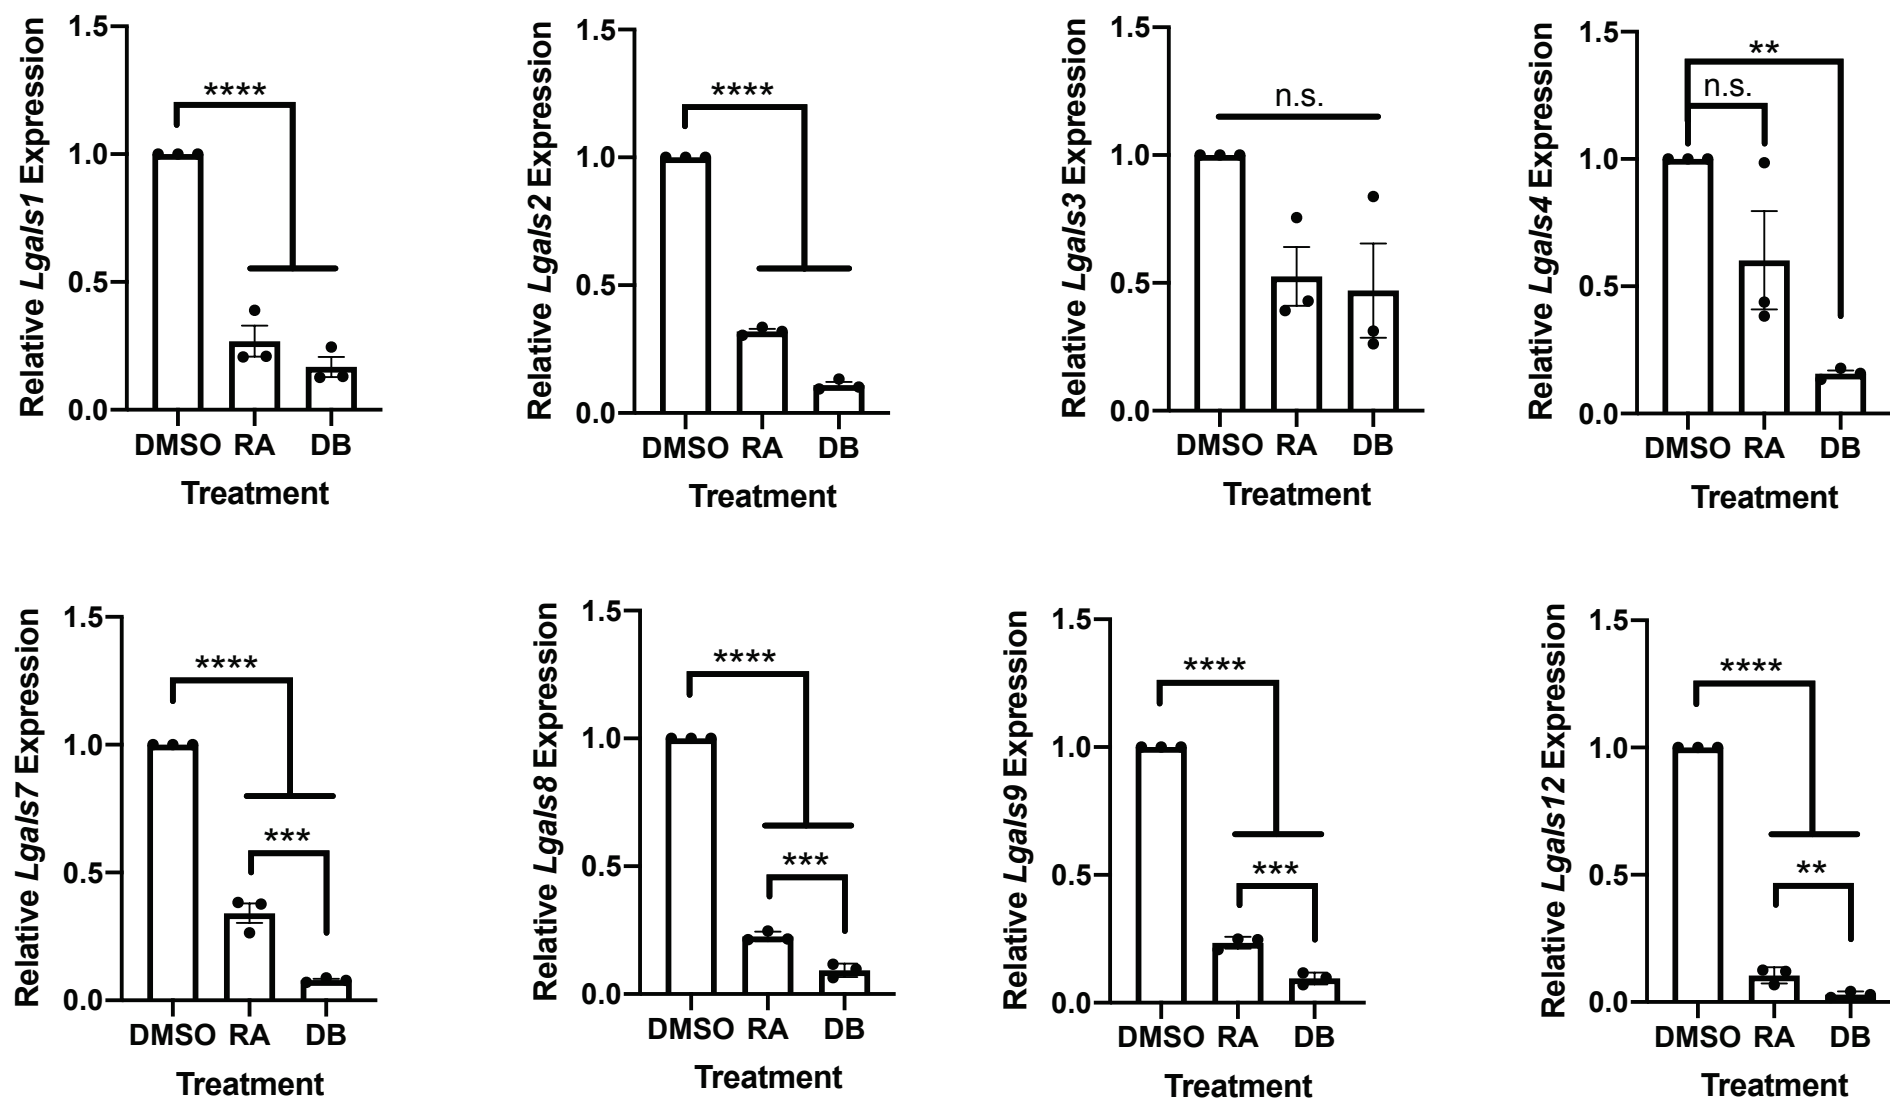

**Supplementary Figure S2.** Expression of many galectins are decreased in F9 cells differentiated towards a XEN-like lineage. Expression of *Lgals1*, *Lgals2*, *Lgals3*, *Lgals4*, *Lgals7*, *Lgals8*, *Lgals9* and *Lgals12* as detected by RT-qPCR in F9 cells treated with DMSO (control), 0.5 μM RA or 0.5 μM RA + db-cAMP. Bars represent mean values ± S.E.M, N=3. \*\*P<0.01, \*\*\*P<0.001, \*\*\*\*P<0.0001.
